# Supplementary material
Source: Research Square preprint supplement (doi:10.21203/rs.3.rs-10084772/v1)

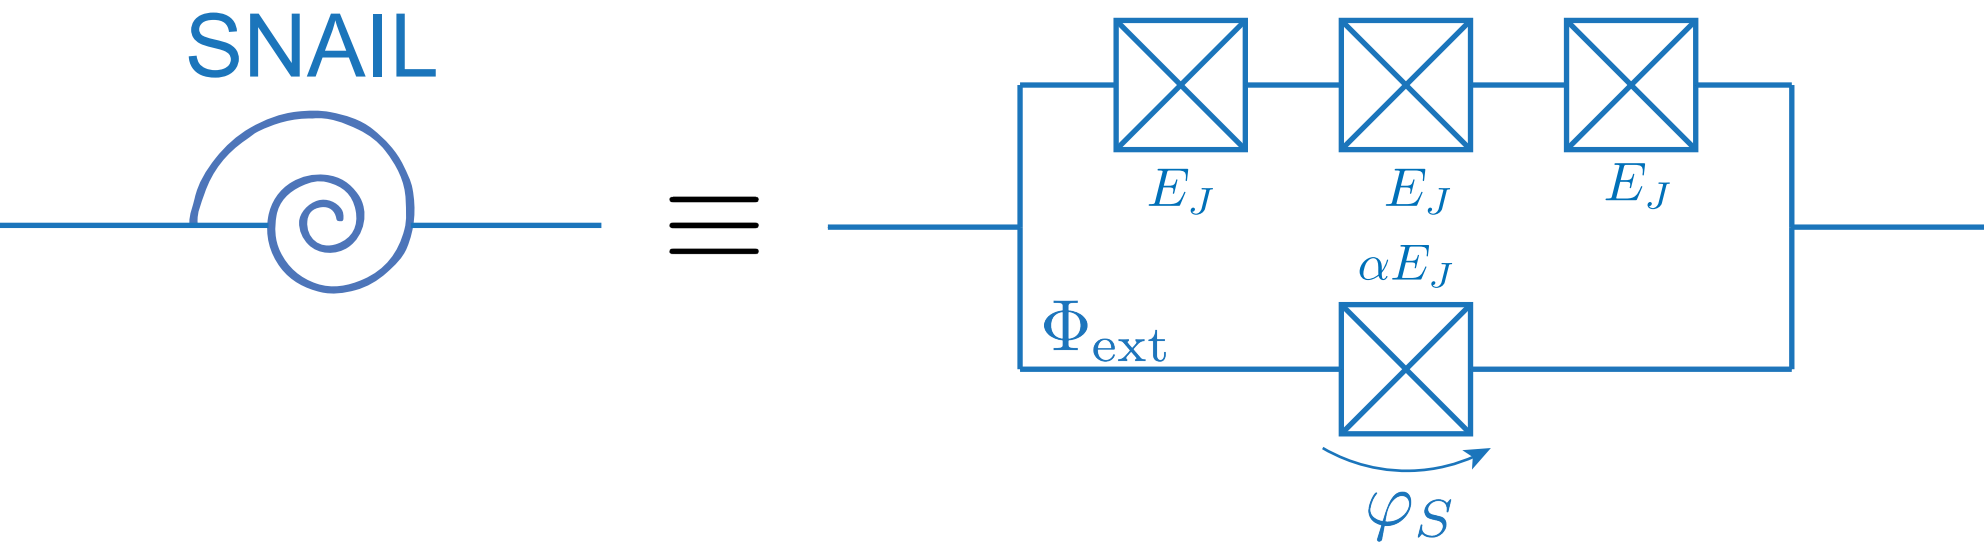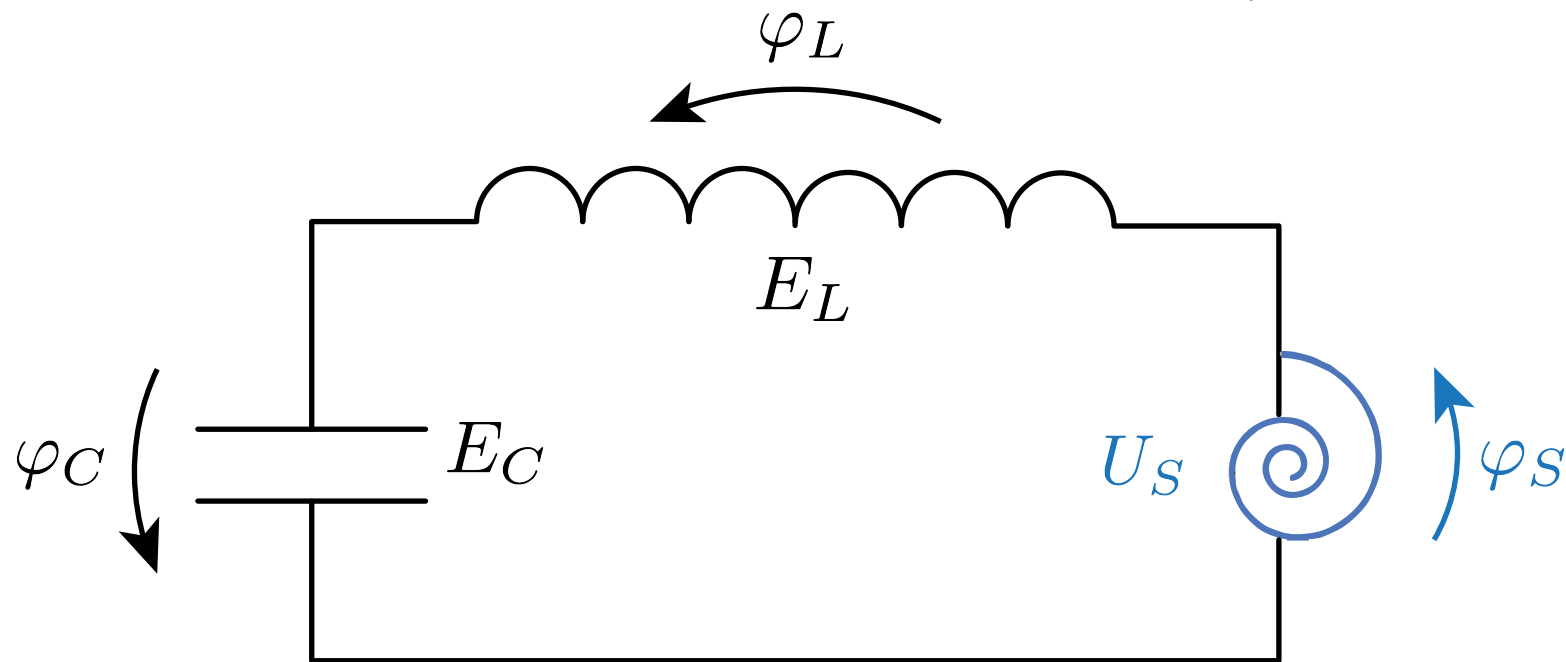

Supplement: Supplementary file 1 [file SNAIL_schematic.pdf › Supplement/si-figs/SNAIL_schematic.pdf]

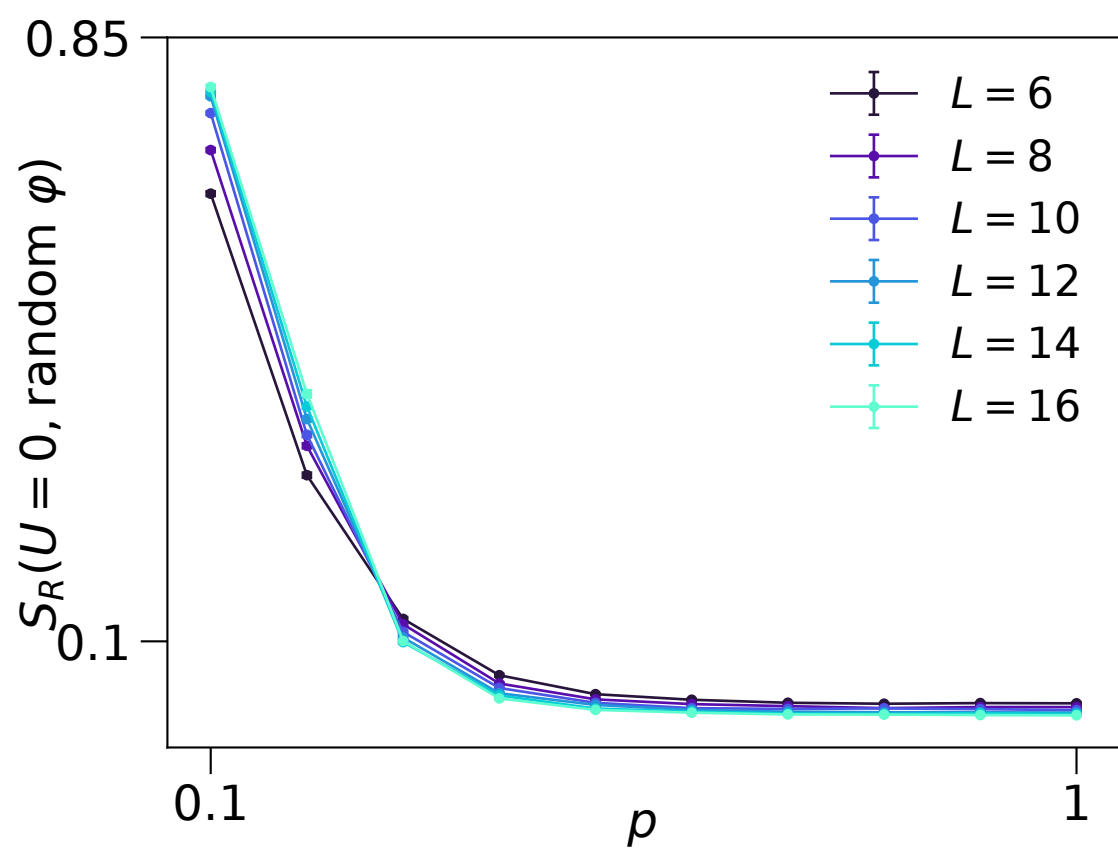

Supplement: Supplementary file 2 [file bsrp.pdf › Supplement/si-figs/bsrp.pdf]

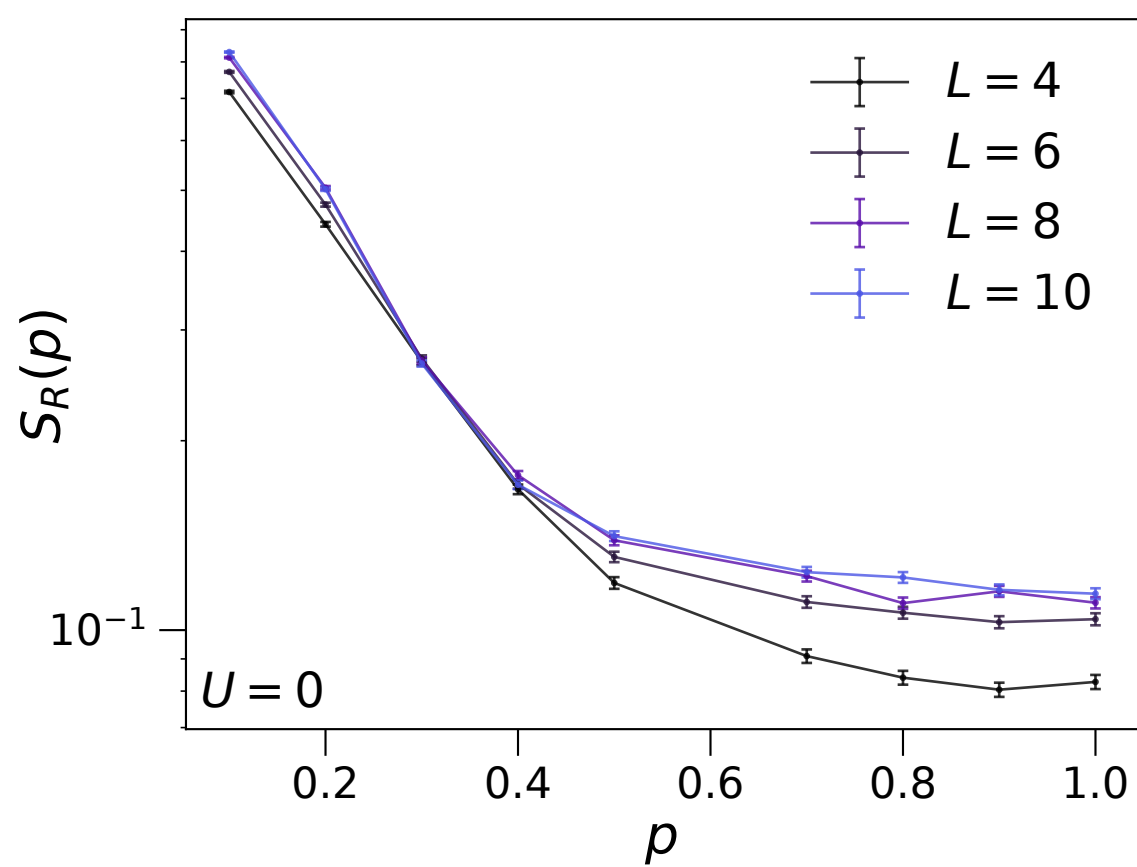

Supplement: Supplementary file 3 [file checkerboard0.pdf › Supplement/si-figs/checkerboard0.pdf]

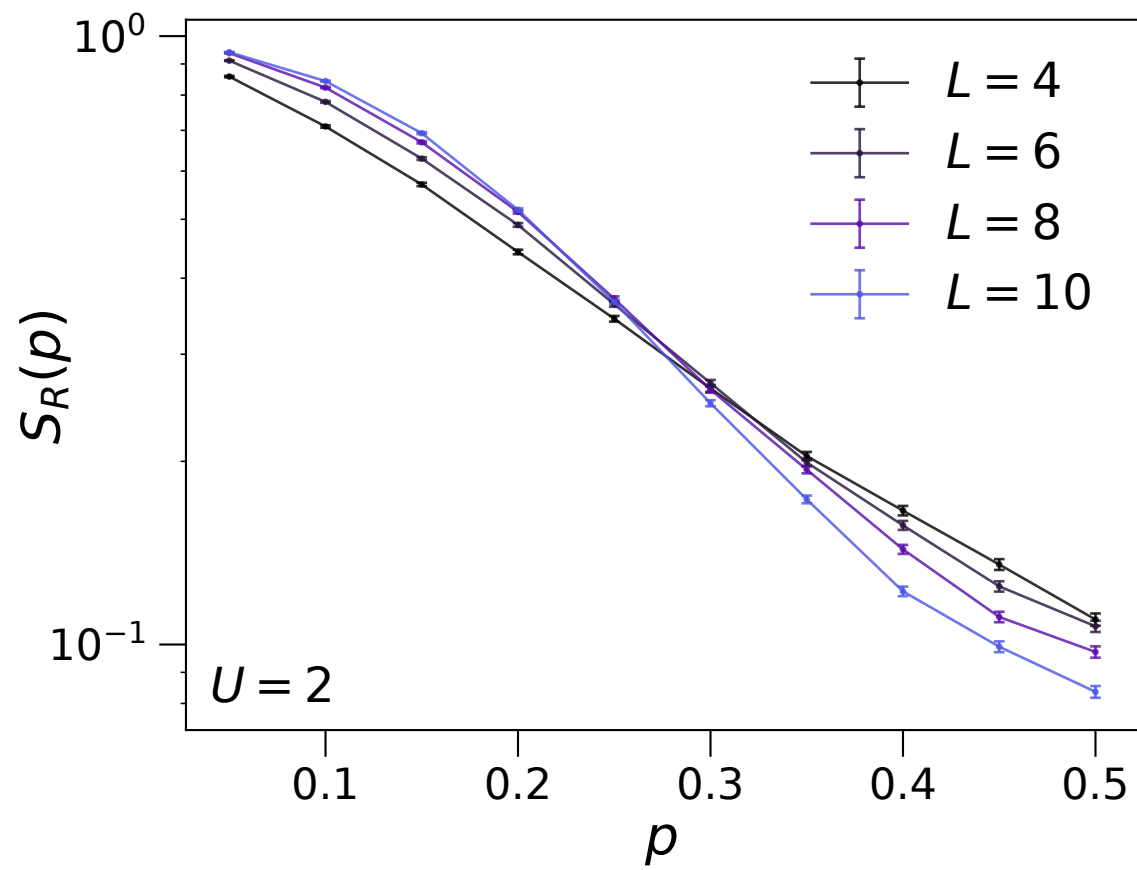

Supplement: Supplementary file 4 [file checkerboard2.pdf › Supplement/si-figs/checkerboard2.pdf]

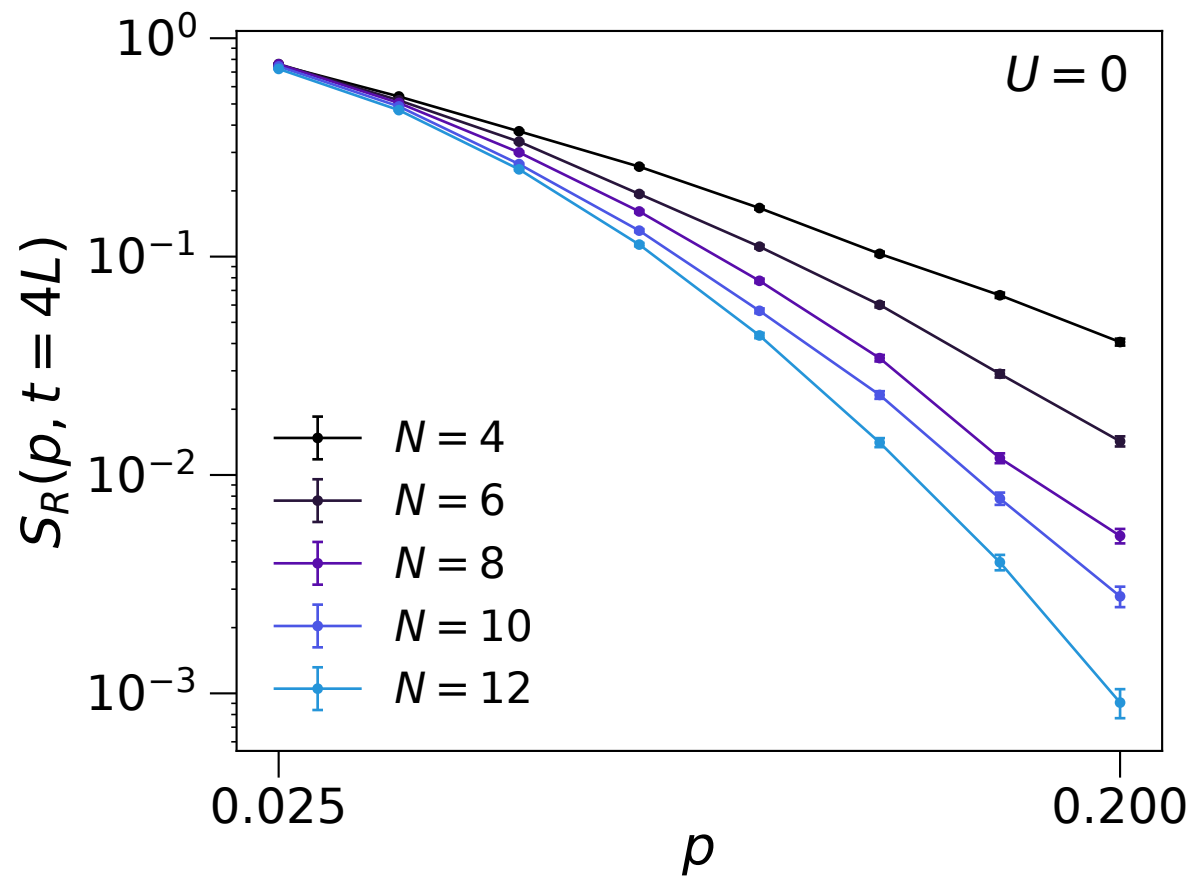

Supplement: Supplementary file 5 [file du0.pdf › Supplement/si-figs/du0.pdf]

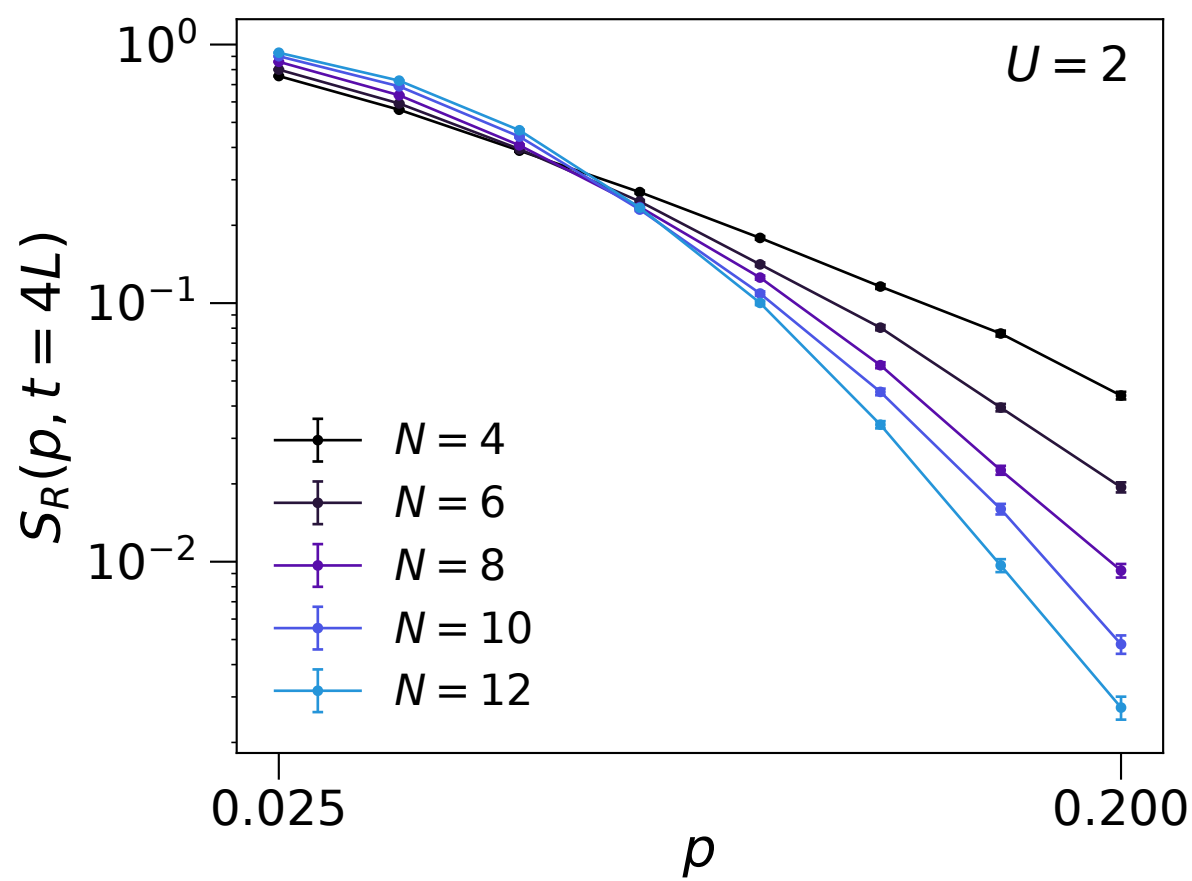

Supplement: Supplementary file 6 [file du2.pdf › Supplement/si-figs/du2.pdf]

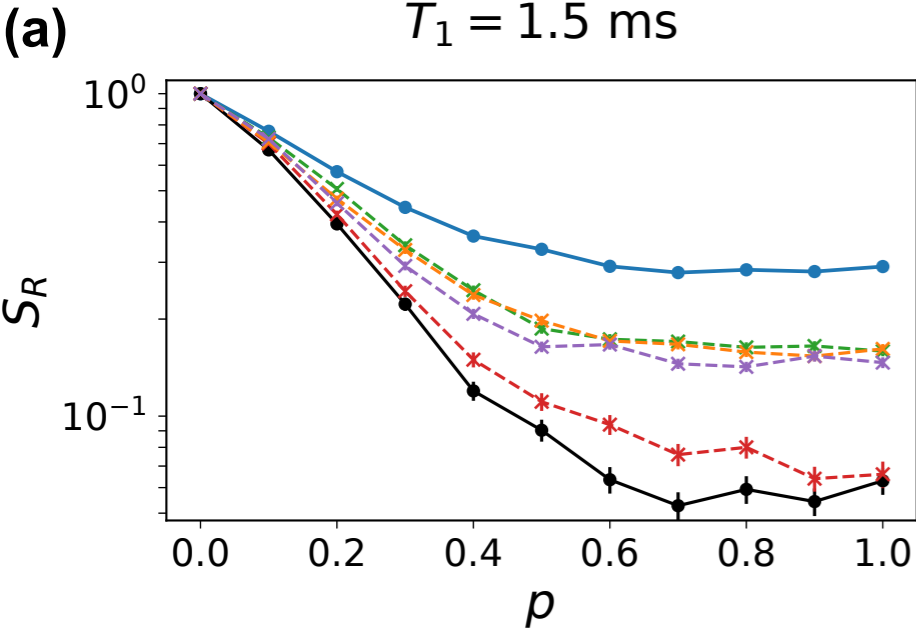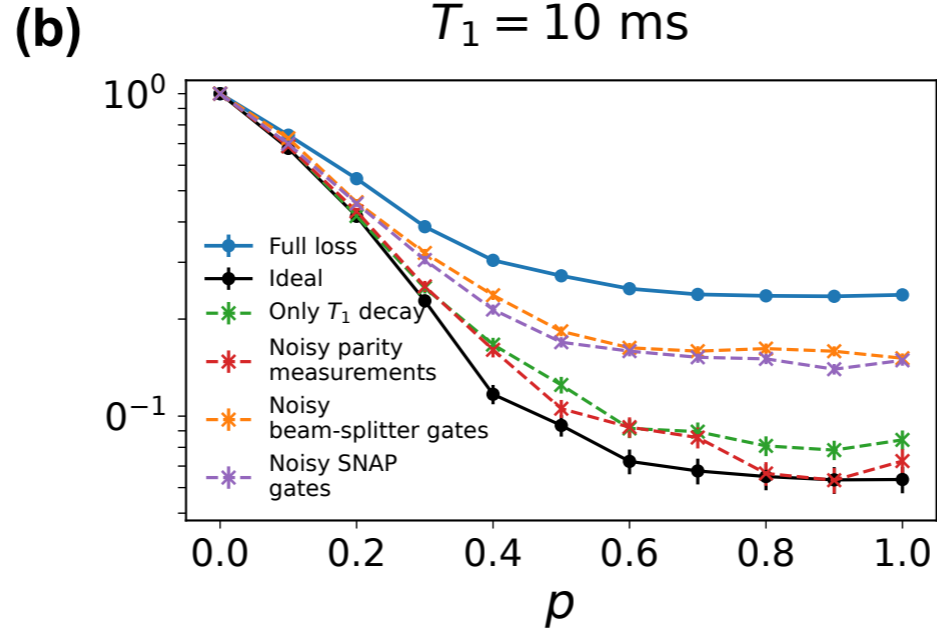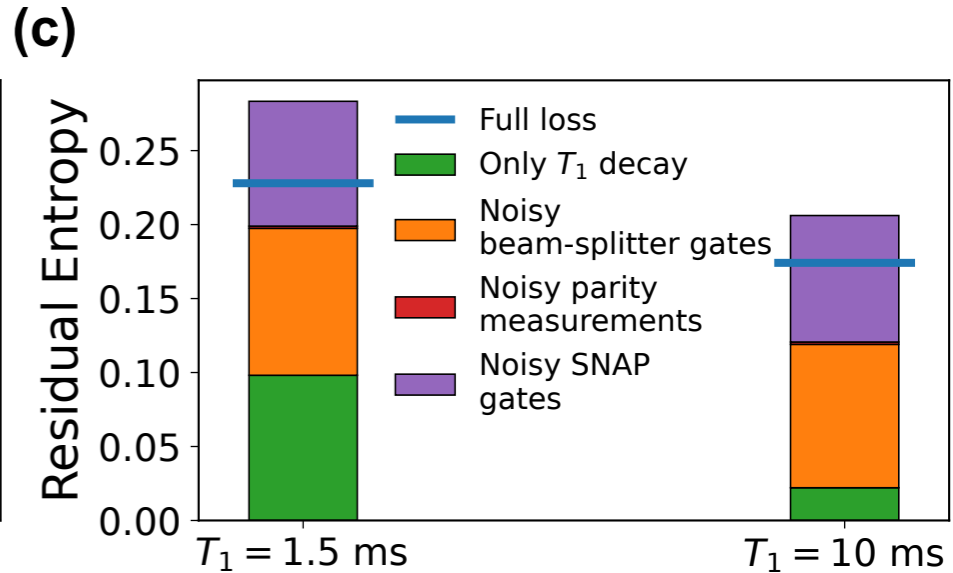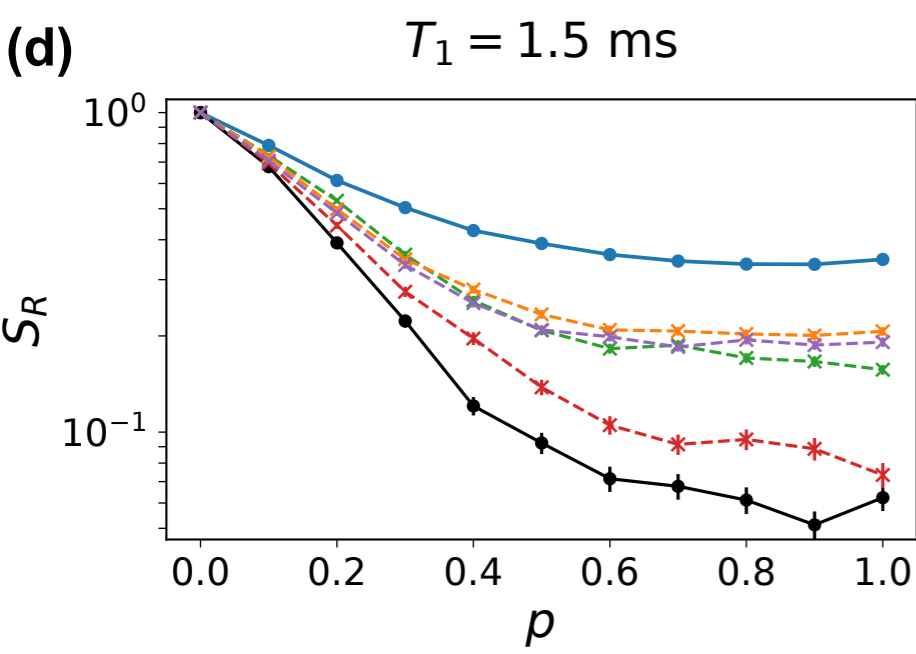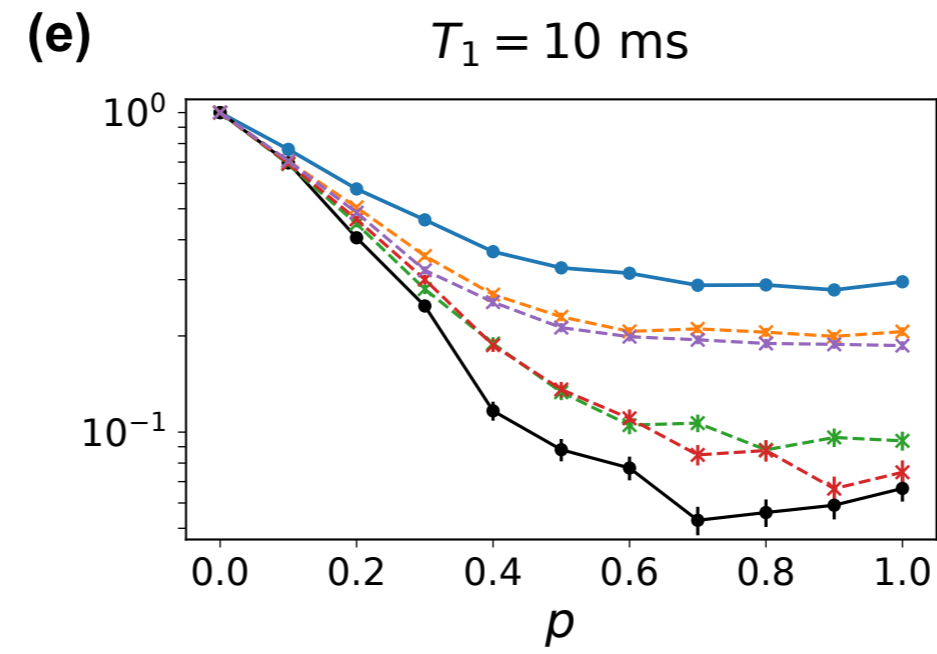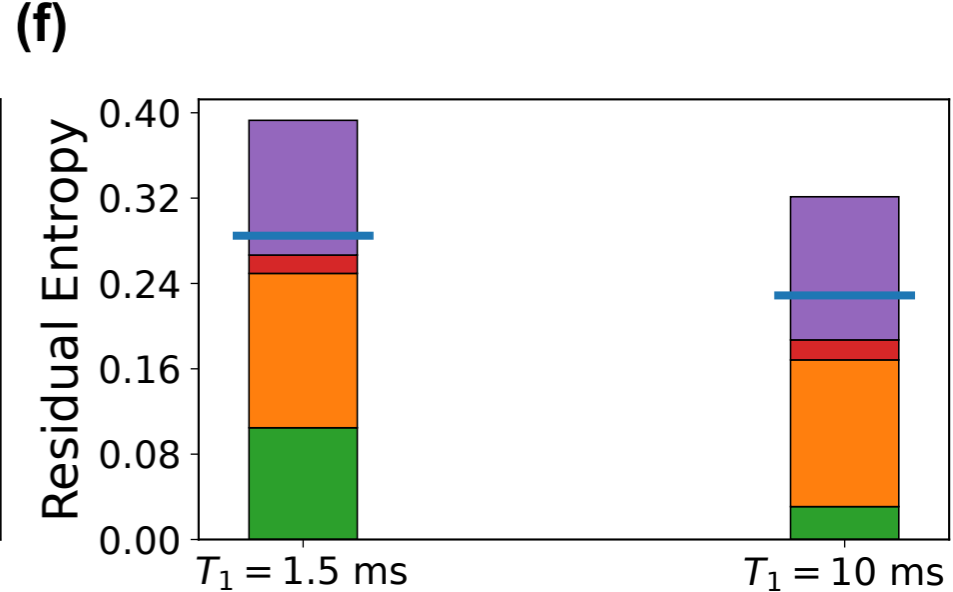

Supplement: Supplementary file 7 [file error_budget_combined.pdf › Supplement/si-figs/error_budget_combined.pdf]

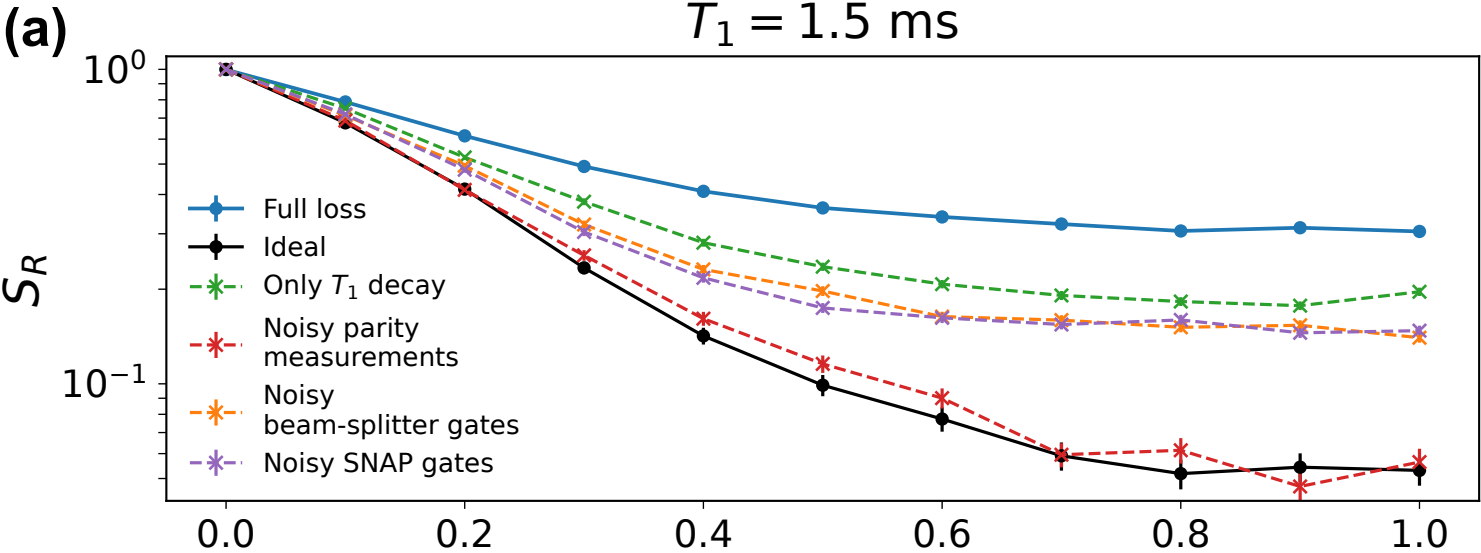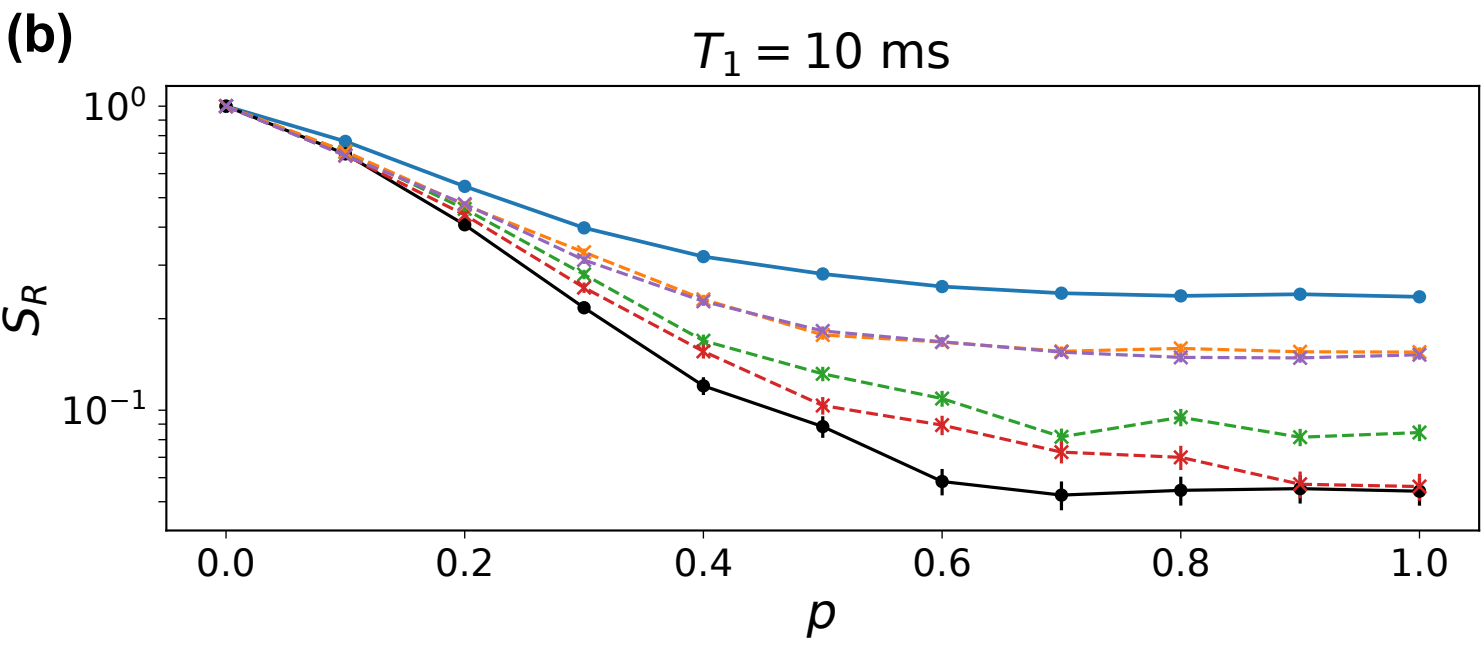

Supplement: Supplementary file 8 [file error_budget_extra_int.pdf › Supplement/si-figs/error_budget_extra_int.pdf]

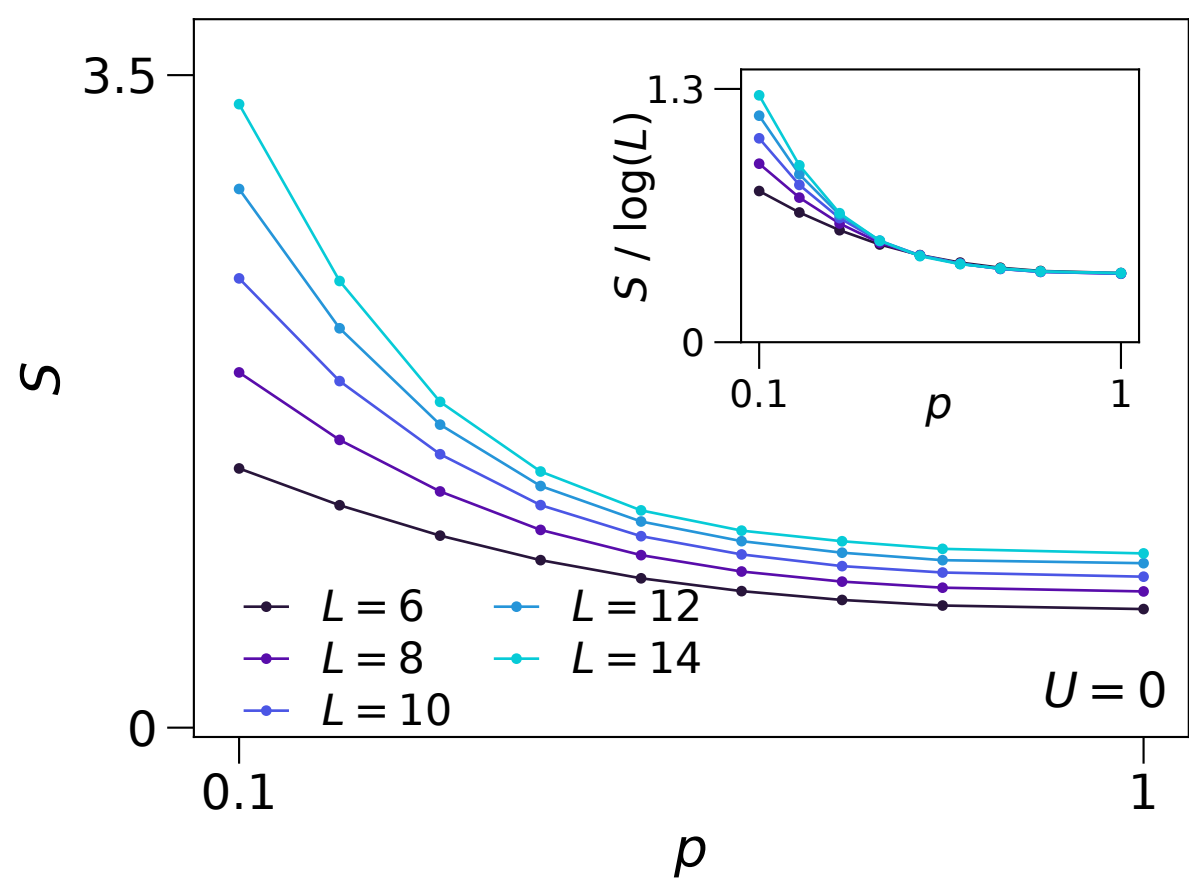

Supplement: Supplementary file 9 [file half-cutS-0.pdf › Supplement/si-figs/half-cutS-0.pdf]

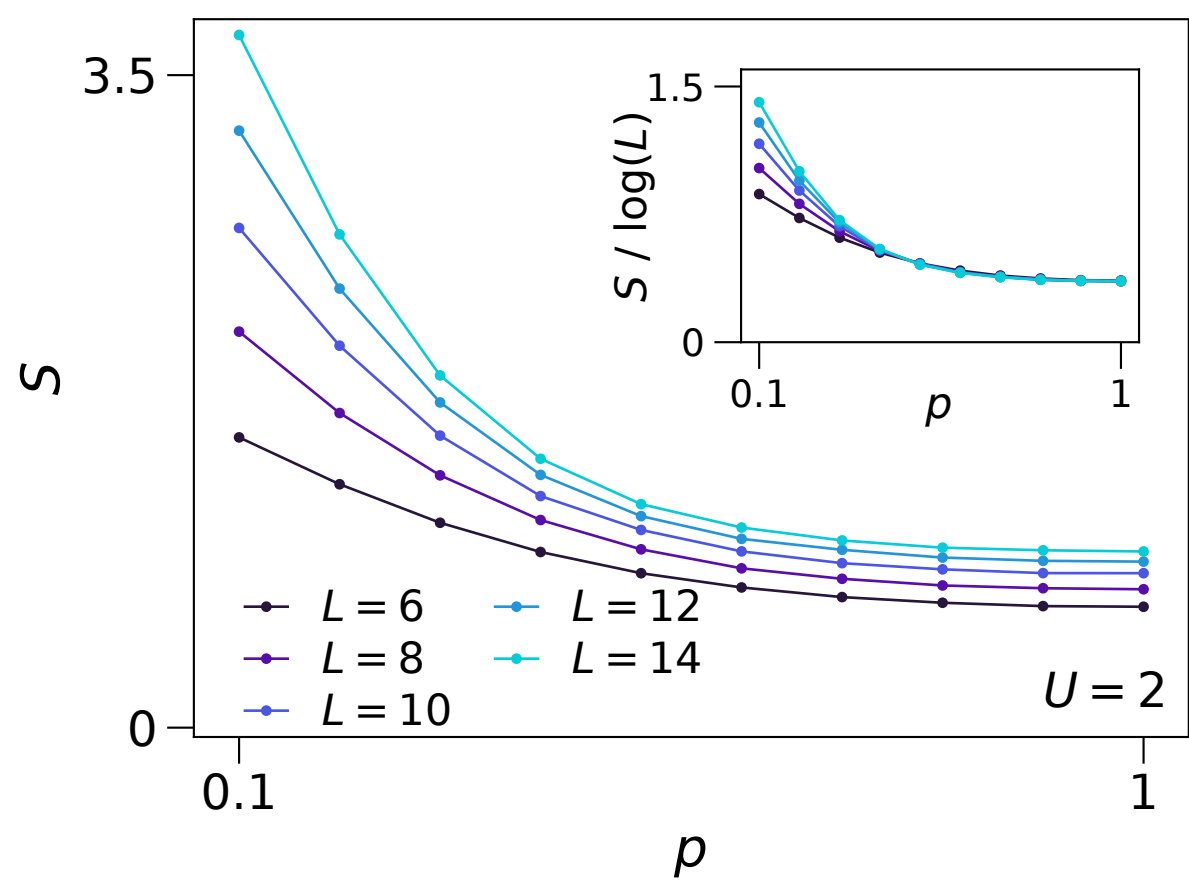

Supplement: Supplementary file 10 [file half-cutS-2.pdf › Supplement/si-figs/half-cutS-2.pdf]

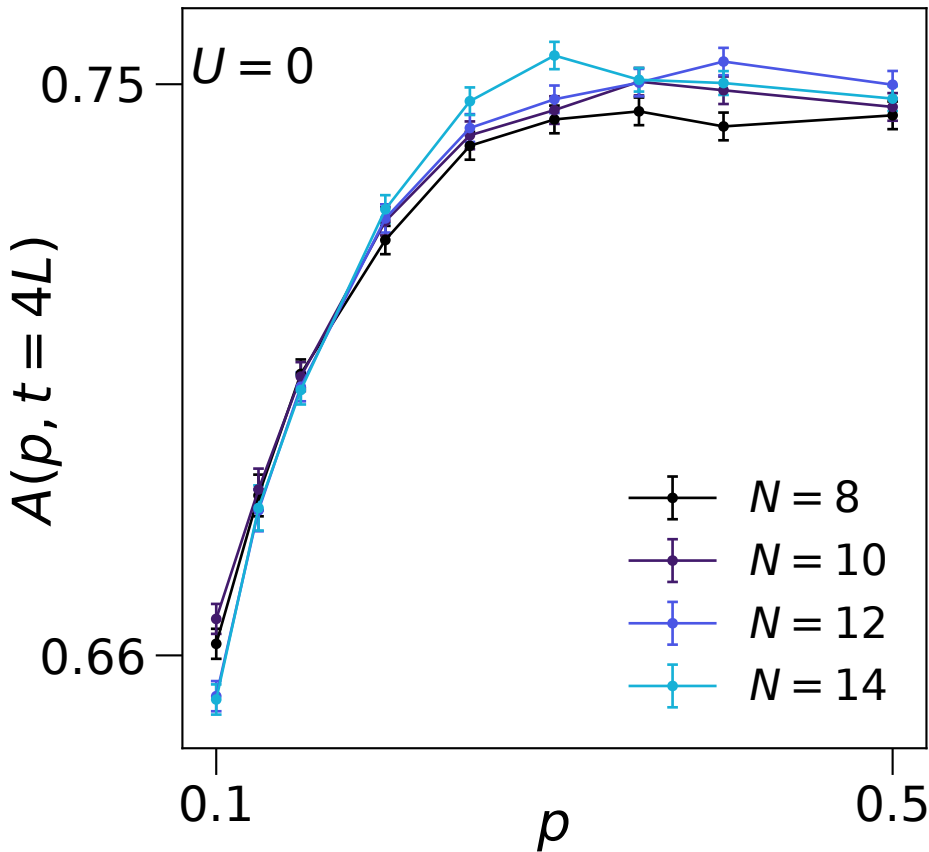

Supplement: Supplementary file 11 [file learn0.pdf › Supplement/si-figs/learn0.pdf]

$$|\psi_{t=0}\rangle = \frac{1}{\sqrt{2}} \left[ |02\rangle + |20\rangle \right]$$

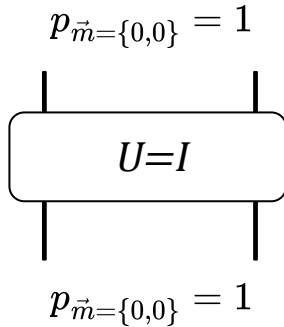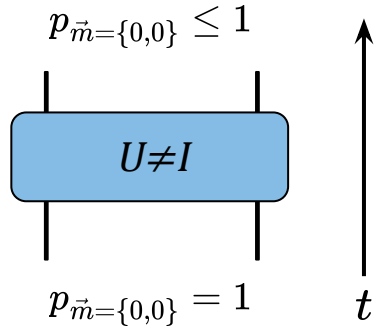

Supplement: Supplementary file 12 [file scramble.pdf › Supplement/si-figs/scramble.pdf]

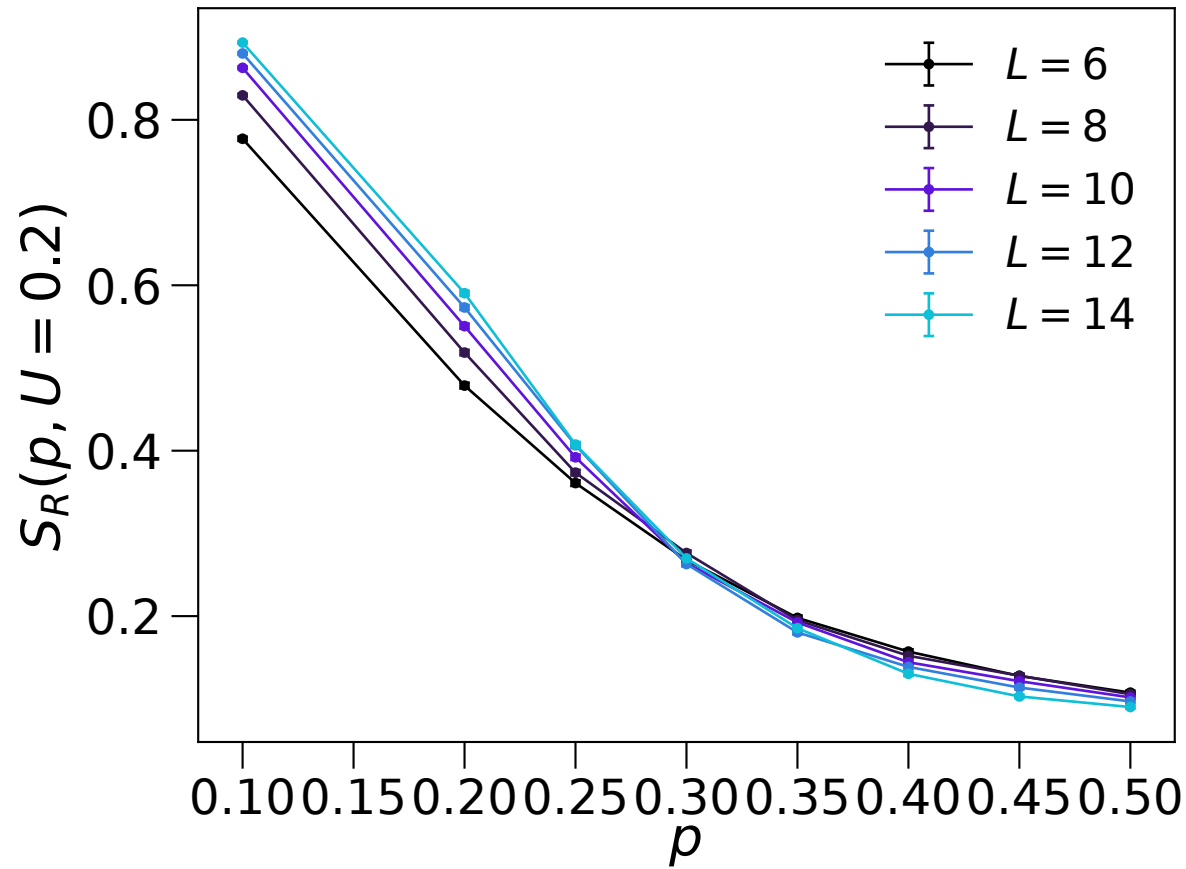

Supplement: Supplementary file 13 [file u0.2.pdf › Supplement/si-figs/u0.2.pdf]

$S_R(U=0, \text{fixed } \varphi)$

0.8

0.6

0.4

0.2

0.2

0.4

0.6

0.8

1.0

$\rho$

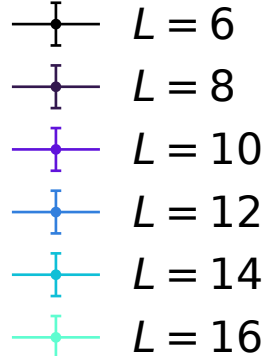

Supplement: Supplementary file 14 [file u0.pdf › Supplement/si-figs/u0.pdf]

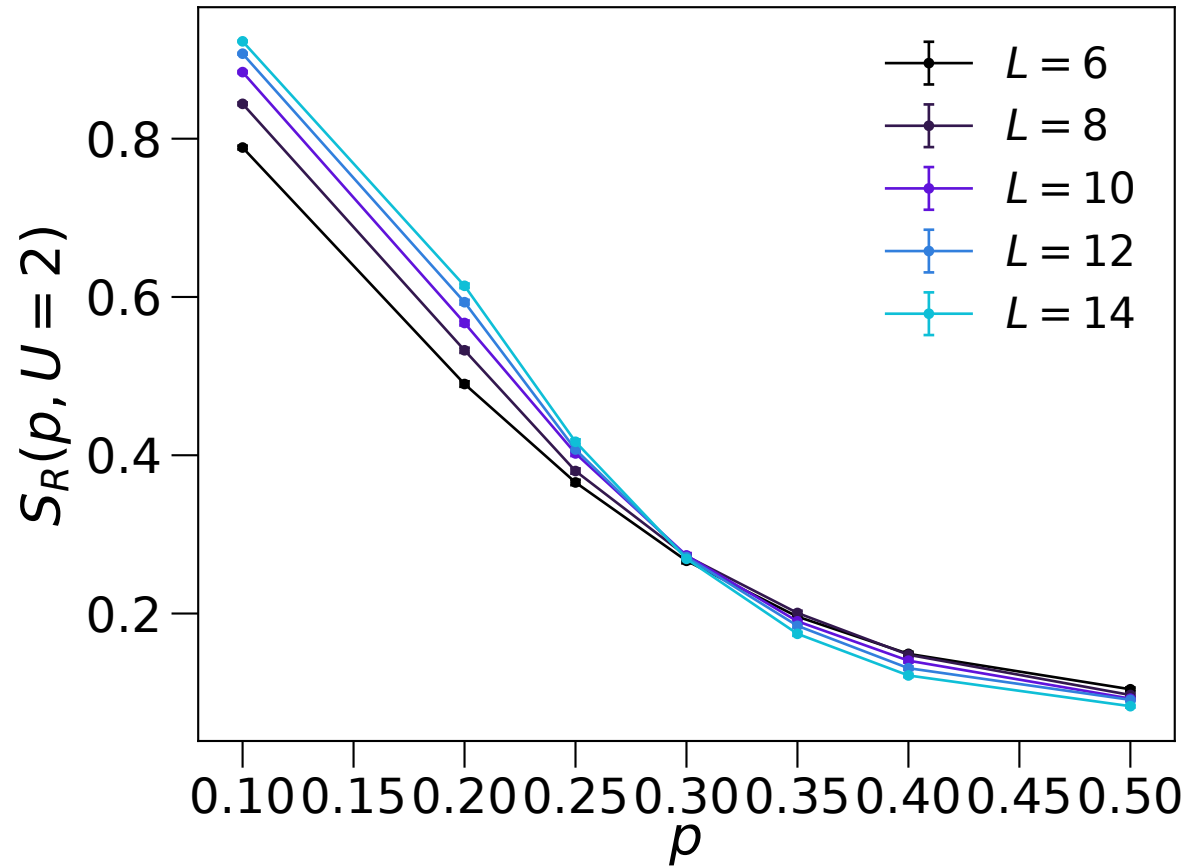

Supplement: Supplementary file 15 [file u2.pdf › Supplement/si-figs/u2.pdf]

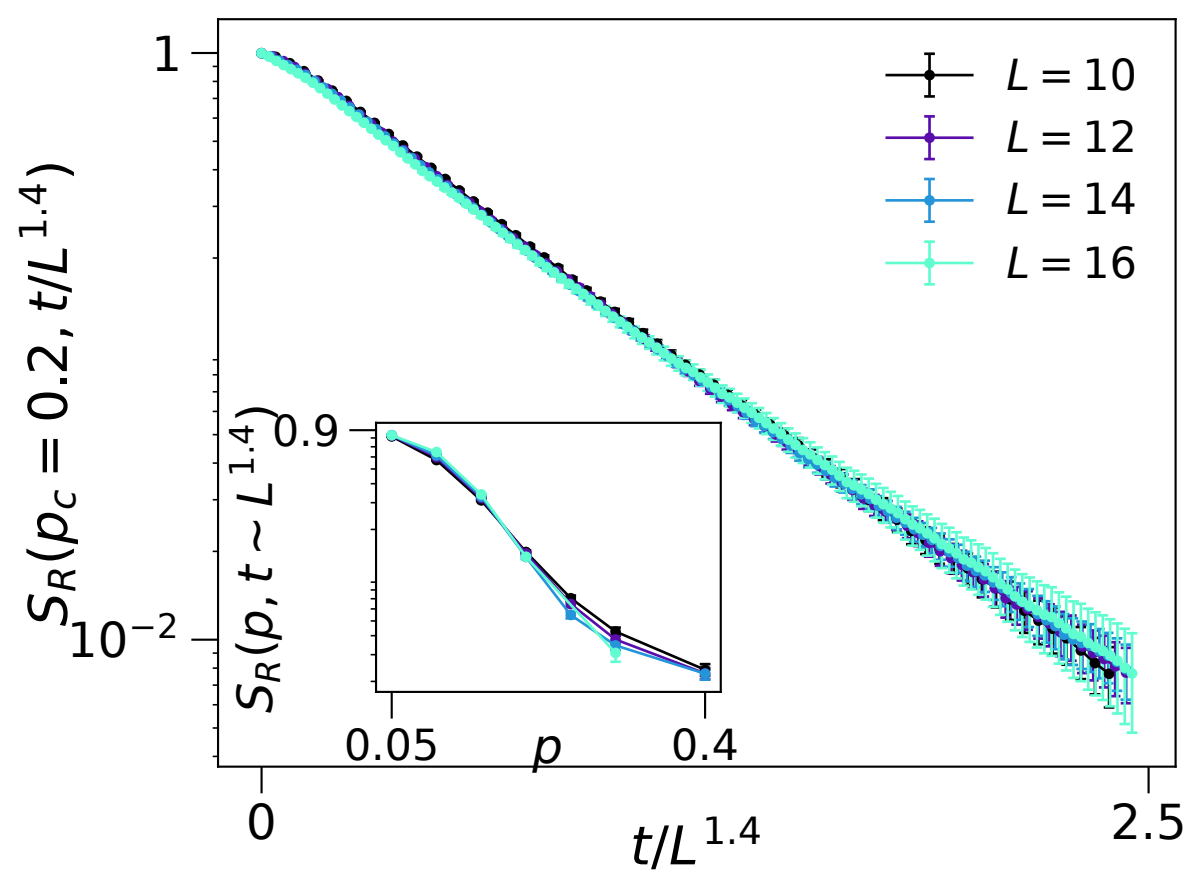

Supplement: Supplementary file 16 [file z=1.4.pdf › Supplement/si-figs/z=1.4.pdf]

$\frac{1}{L^3} S_R(p_c = 0.15, t/L^{5/3})$

1

- $N = 10$
- $N = 12$
- $N = 14$
- $N = 16$

$S_R(p, t \sim L^{5/3})$

0.05

$p$

0.3

0

$t/L^{5/3}$

2.5

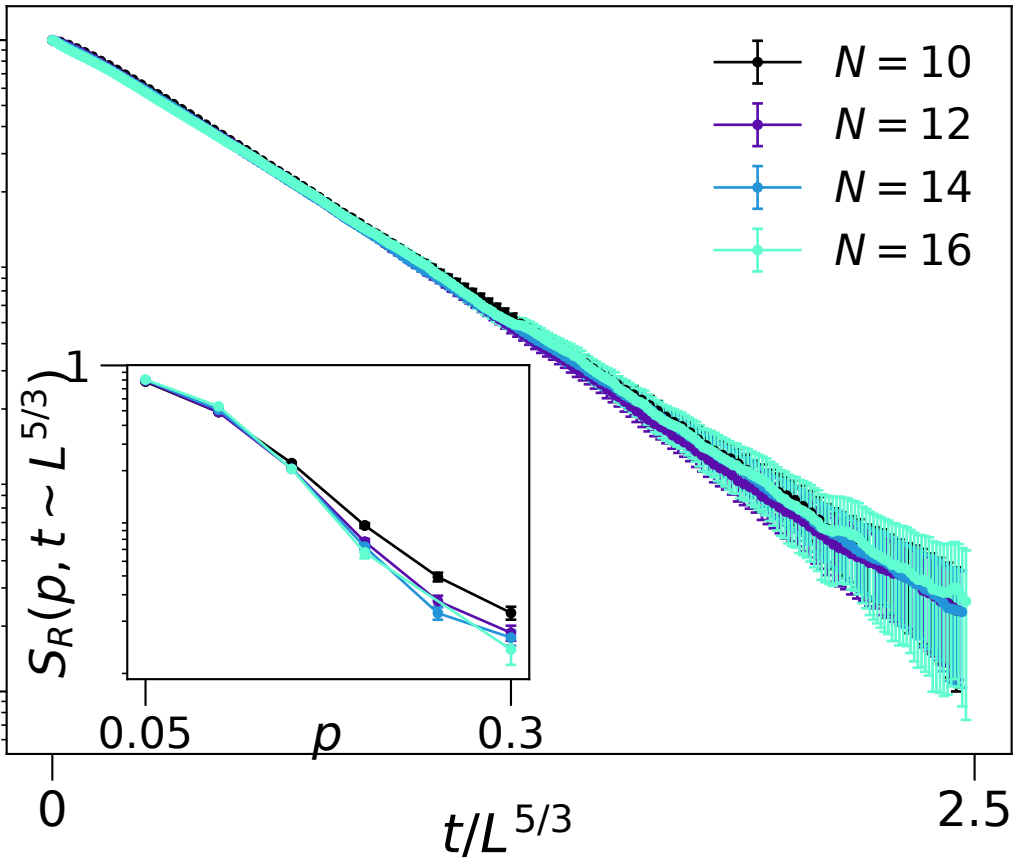

Supplement: Supplementary file 17 [file z=1.66.pdf › Supplement/si-figs/z=1.66.pdf]
